# Supplementary material for: A bifunctionalised Pb-based MOF for iodine capture and dye removal
Source: Royal Society of Chemistry journal article supplement (doi:10.1039/d3dt00237c), 2023-01-01
Supplement: d3dt00237c1.pdf [file d3dt00237c1.pdf]

## Supporting information

### A Bifunctionalised Pb-Based MOF for Iodine Capture and Dyes Removal

**Table S1.** Selected bond lengths (Å) and bond angles (degree) for **SM-3**

|           |             |
|-----------|-------------|
| Pb1-O1    | 2.449 (3)   |
| Pb1-O3    | 2.477 (4)   |
| Pb1-O4    | 2.704 (4)   |
| Pb1-N1    | 2.676 (4)   |
| Pb1-N4    | 2.592 (4)   |
| O3-Pb1-O1 | 79.74 (12)  |
| O4-Pb1-O1 | 114.60 (12) |
| O4-Pb1-O3 | 49.18 (11)  |
| N1-Pb1-O1 | 138.21 (11) |
| N1-Pb1-O3 | 84.11 (11)  |
| N4-Pb1-O4 | 80.88 (11)  |
| N4-Pb1-O1 | 76.65 (12)  |
| N4-Pb1-O3 | 77.84 (12)  |
| N4-Pb1-O4 | 118.37 (12) |
| N4-Pb1-N1 | 62.32 (12)  |

**Table S2:** Comparison of structural properties of Pb-crystals with **SM-3**.

| Synthesized Pb-crystals                                                     | Bond Distances                                                                | Geometry                         | Anagostic interactions | Dimensions | Ref. |
|-----------------------------------------------------------------------------|-------------------------------------------------------------------------------|----------------------------------|------------------------|------------|------|
| [Pb(mip)(1,4-NDC)] <sub>n</sub>                                             | Pb-O = 2.465(3)-2.693(3)Å,<br>Pb-N = 2.464(3)-2.554(3)Å,<br>Pb-Pb = 11.5400 Å | Pentagonal bipyramidal           | Absent                 | 2-D        | 36   |
| [Pb <sub>2</sub> (pzp) <sub>2</sub> (adip)(NO <sub>3</sub> ) <sub>2</sub> ] | Pb-O = 2.412(4)-2.693(3)Å,<br>Pb-N = 2.615(4)-2.557(4) Å                      | Pentagonal bipyramidal           | Absent                 | 2-D        | 37   |
| [Pb(pzp)(glu)]                                                              | Pb-O = 2.592(4)-2.586(4)Å, Pb-N = 2.747(4)-2.691(4) Å                         | Distorted pentagonal bipyramidal | Absent                 | 2-D        | 37   |

|                                                                                                                                               |                                                                                 |                                |         |     |                  |
|-----------------------------------------------------------------------------------------------------------------------------------------------|---------------------------------------------------------------------------------|--------------------------------|---------|-----|------------------|
| [Pb(pzp)(chdc)]·[Pb(pzp)-(chdc)]· pzp ·H <sub>2</sub> O                                                                                       | Pb-O= 2.360(7)-2.481(7)Å<br>Pb-N= 2.700(8)-2.718(8) Å                           | Octahedral                     | Absent  | 2-D | 37               |
| [Pb <sub>2</sub> (ndc) <sub>2</sub> (pzp) <sub>2</sub> (H <sub>2</sub> O)]· 0.5H <sub>2</sub> O                                               | Pb-O= 2.714(4)-2.729(4) Å<br>Pb-N= 2.624(4)-2.644(4) Å<br>Pb-Pb= 4.333 Å        | Octahedral                     | Absent  | 3-D | 37               |
| [Pb(pzp)(1,3-bdc)(H <sub>2</sub> O) <sub>0.5</sub> ]                                                                                          | Pb-O= 2.382(4)-2.482(4) Å<br>PbN=2.504(5)-2.671(5)Å                             | Pentagonal bipyramidal         | Absent  | 2-D | 37               |
| [Pb(ptic)(1,4-bdc)]· 0.75H <sub>2</sub> O                                                                                                     | Pb-O= 2.551(4)-2.510(4) Å<br>Pb-N= 2.651(4)-2.558(5) Å                          | Octahedral                     | Absent  | 2-D | 37               |
| [Pb(C <sub>8</sub> H <sub>4</sub> O <sub>4</sub> )(C <sub>24</sub> H <sub>16</sub> N <sub>2</sub> )] <sub>n</sub>                             | Pb-O=2.503 (4)- 2.663 (4) Å<br>Pb-N= 2.686 (4)- 2.677 (4) Å                     | Octahedral                     | Absent  | 2-D | 38               |
| [Pb <sub>2</sub> (C <sub>12</sub> H <sub>6</sub> O <sub>4</sub> ) <sub>2</sub> (C <sub>10</sub> H <sub>8</sub> N <sub>2</sub> )] <sub>n</sub> | Pb-O=2.418 (4) Å<br>Pb-N= 2.841 (4)<br>Pb-N= 2.678 (7)- 2.630(6)                | Pentagonal bipyramidal         | Absent  | 3-D | 39               |
| [Pb <sub>2</sub> (C <sub>12</sub> H <sub>6</sub> O <sub>4</sub> ) <sub>2</sub> (C <sub>12</sub> H <sub>8</sub> N <sub>2</sub> )] <sub>n</sub> | Pb-O=2.464 (4)-2.756 (4) Å<br>Pb-N=2.622(4)-2.701(4)Å                           | Octahedral                     | Absent  | 3-D | 40               |
| [Pb(1,4-bdc)(MOPIP)] <sub>n</sub>                                                                                                             | Pb-Pb=11.4210(24) Å                                                             | Octahedral                     | Absent  | 1-D | 41               |
| [Pb <sub>2</sub> (1,4-bdc) <sub>2</sub> (dpdp) <sub>2</sub> ].H <sub>2</sub> O                                                                | Average Pb-O = 2.550 Å                                                          | Pentagonal bipyramidal         | Absent  | 3-D | 42               |
| [Pb(bdc)(dma)]                                                                                                                                | Pb-O= 2.440(4)-2.699(4) Å                                                       | Tetragonal bipyramidal         | Absent  | 3-D | 43               |
| <b>SM-3</b>                                                                                                                                   | Pb-O= 2.449(3) to 2.704(4) Å<br>Pb-N= 2.592(4) to 2.676(4) Å.<br>Pb-Pb= 4.355 Å | Distorted square antiprismatic | Present | 2-D | <b>This work</b> |

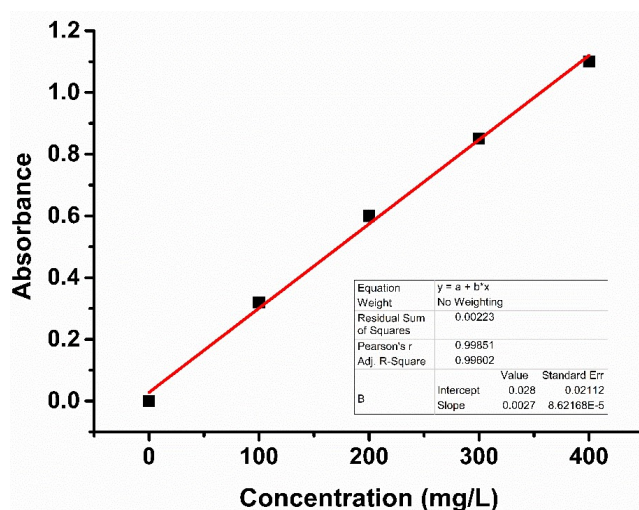

**Fig. S1.** Calibration plot of iodine in a cyclohexane solution via a UV-vis spectrum.

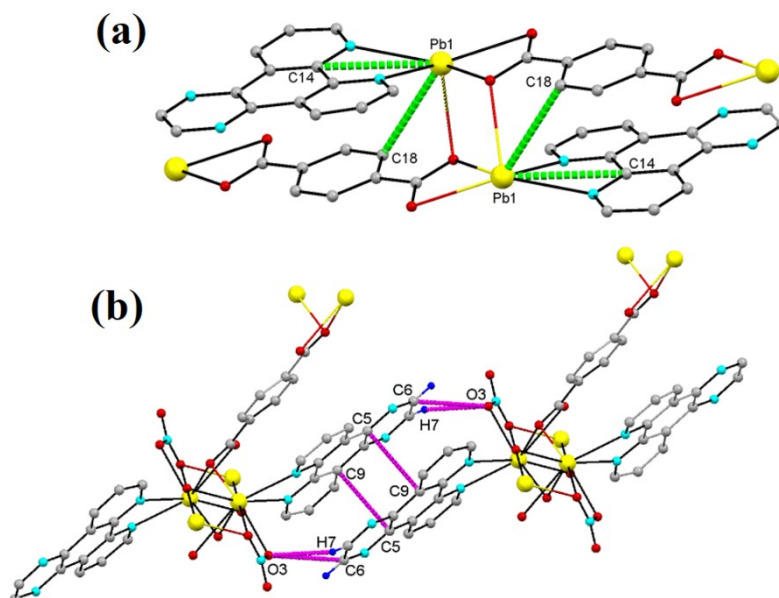

**Fig. S2.** Stability provided due to (a) Pb··· $\pi$  interactions, (b) hydrogen bonding O3···H7-C7, C-H···O and  $\pi$ - $\pi$  stacking interactions in SM-3.

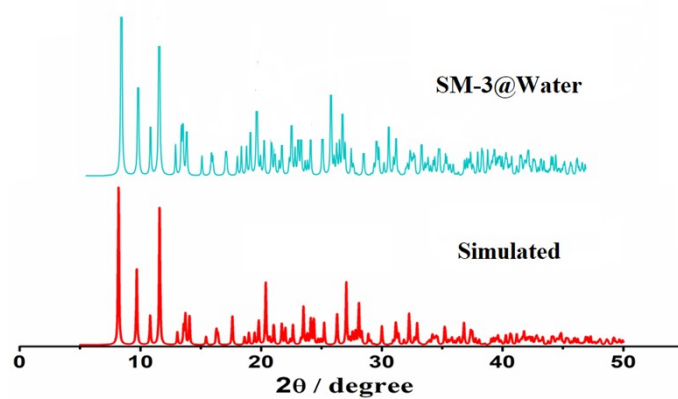

**Fig. S3.** PXRD pattern of synthesized SM-3 before and after immersing in water for 24 h.

**Table S3.** Parameters for first and second-order kinetic models for adsorption studies of Iodine.

| Model                      | Parameters                  | Values  |
|----------------------------|-----------------------------|---------|
| <b>Pseudo first order</b>  | $K_1$ ( $\text{min}^{-1}$ ) | 0.552   |
|                            | $q_e$ (cal.)(mg/g)          | 1148.15 |
|                            | $q_e$ (Exp.)(mg/g)          | 350.06  |
|                            | $R^2$                       | 0.870   |
| <b>Pseudo second order</b> | $K_2$ ( $\text{min}^{-1}$ ) | 0.003   |
|                            | $q_e$ (cal.)(mg/g)          | 455.55  |
|                            | $q_e$ (Exp.)(mg/g)          | 350.06  |
|                            | $R^2$                       | 0.997   |

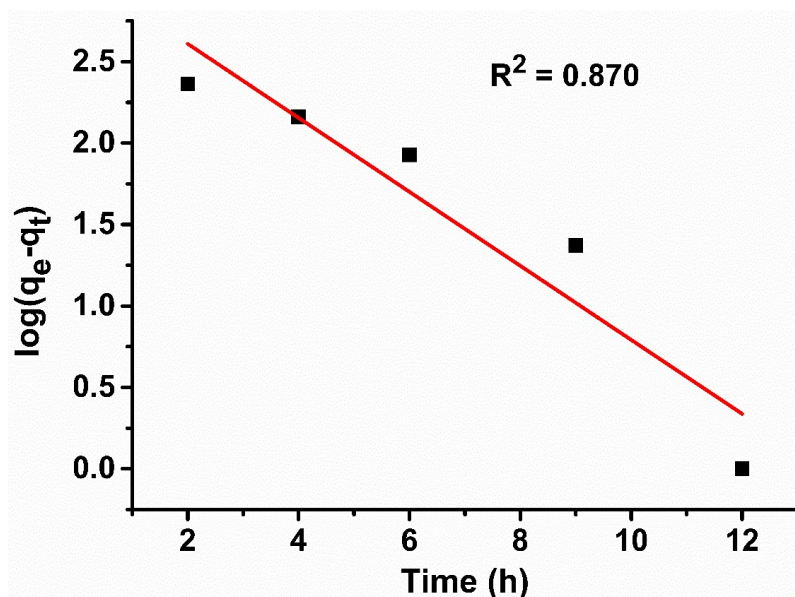

**Fig. S4.** Pseudo-first-order kinetics for the adsorption process of iodine by SM-3 in cyclohexane solution.

**Table S4.** Adsorption isotherm constants of SM-3 MOF for iodine adsorption.

| Langmuir |              |         | Freundlich |       |         |
|----------|--------------|---------|------------|-------|---------|
| $K_L$    | $q_m$ (mg/g) | $R_L^2$ | $K_F$      | $1/n$ | $R_F^2$ |
| 0.032    | 293.43       | 0.995   | 41.52      | 2.46  | 0.965   |

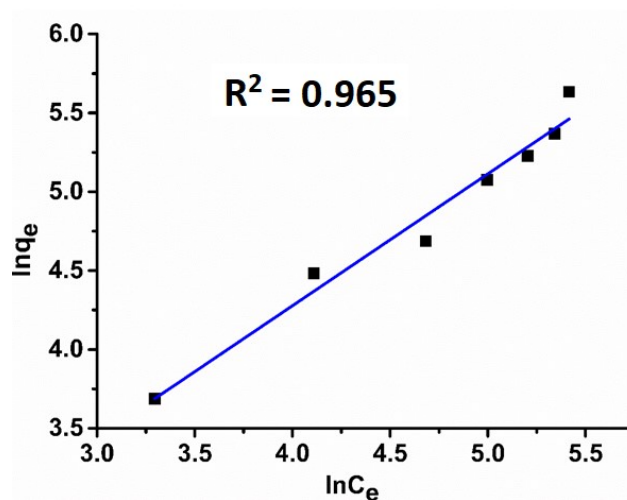

**Fig. S5.** Freundlich isotherm model for the adsorption of iodine on SM-3.

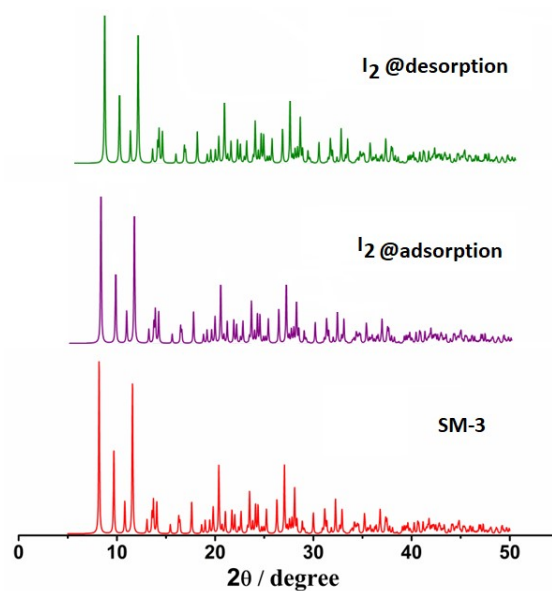

**Fig. S6.** PXRD pattern of synthesized SM-3 and after iodine adsorption and desorption.

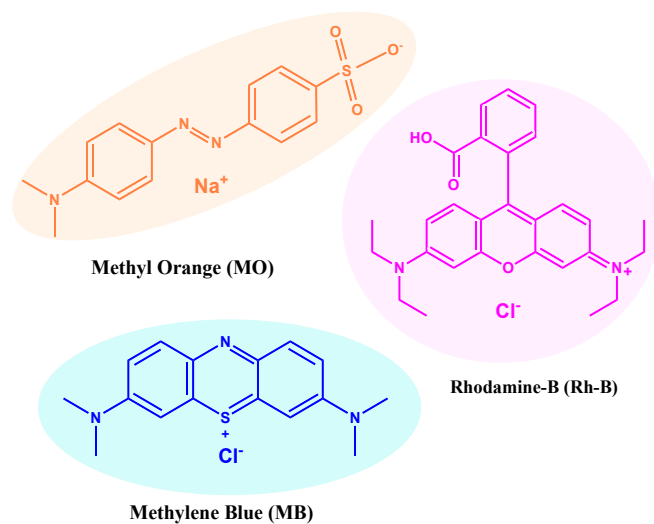

**Fig. S7** Chemical structures of cationic and anionic dyes used in the experiments.

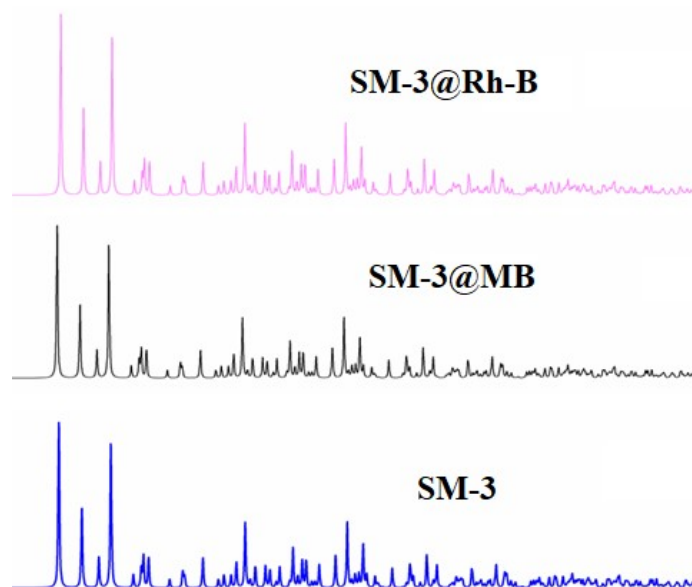

**Fig. S8.** PXRD pattern of synthesized **SM-3** and after adsorption of MB and Rh-B.

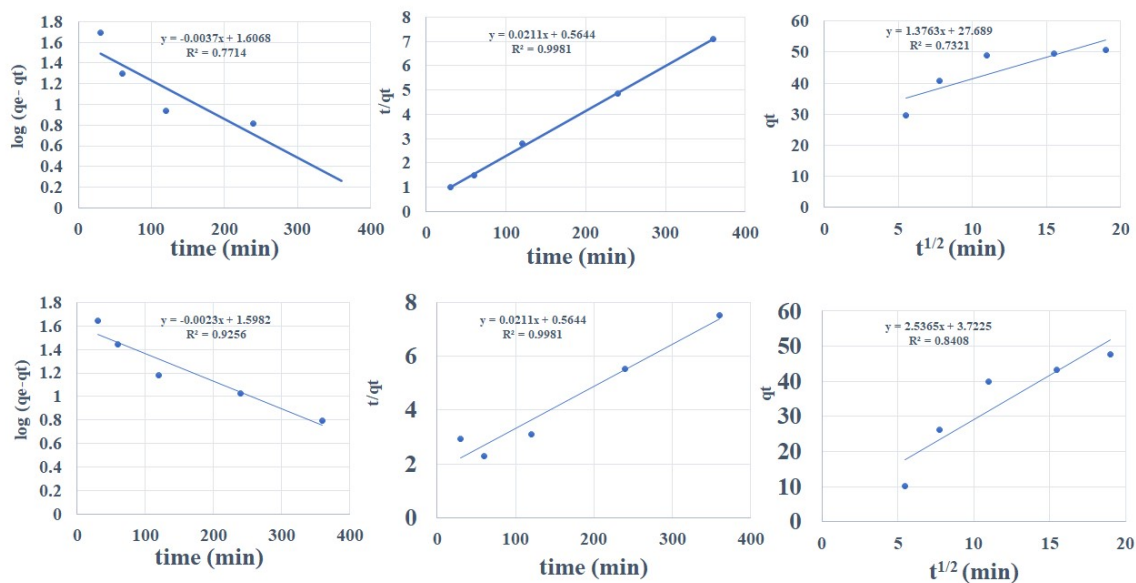

**Fig. S9.** The adsorption of MB and Rh-B onto SM-3 using pseudo-first-order (a), pseudo-second-order (b) and intra particle (c) kinetics models.

**Table S5.** Summary of maximum adsorption capacities ( $q_{\max}$ ) of various commercial adsorbent towards MB and/or Rh-B.

| Adsorbent                                         | Dye             | Possible Mechanism                                                                                            | Removal Efficiency | Ref.             |
|---------------------------------------------------|-----------------|---------------------------------------------------------------------------------------------------------------|--------------------|------------------|
| Apricot stones and commercial activated carbon106 | MB              | Chemisorption                                                                                                 | 36.68 mg/g         | 102              |
| Red Oak (Quercus rubra)                           | MB              | Chemisorption                                                                                                 | 97.18%             | 103              |
| Rice husk                                         | Rh-B            | Chemisorption                                                                                                 | 478.5 mg/g         | 104              |
| Coconut leaves                                    | MB              | Chemisorption                                                                                                 | 149.3 mg/g         | 105              |
| Lemon peels                                       | MB              | Chemisorption                                                                                                 | 841.37 mg/g        | 106              |
| Carbonaceous slurry waste                         | RhB             | Physiosorption                                                                                                | 91.1 mg/g          | 107              |
| Platanusorientalis leaf                           | MB              | -                                                                                                             | 114.94 mg/g        | 108              |
| Coal fly ash                                      | MB              | -                                                                                                             | 85%                | 109              |
| <b>SM-3</b>                                       | <b>MB, Rh-B</b> | <b>Electrostatic interaction.<br/>Cation- <math>\pi</math>, <math>\pi</math>-<math>\pi</math> interaction</b> | <b>90%, 92%</b>    | <b>This work</b> |

**Table S6.** Determination of zeta potential of **SM-3** at varying pH.

| pH | Zeta Potential (mV) |
|----|---------------------|
| 2  | 0.23                |
| 3  | 0.22                |
| 4  | 0.23                |
| 5  | 0.22                |
| 6  | 0.00                |
| 7  | -0.23               |
| 8  | -0.30               |
| 9  | -0.32               |
| 10 | -0.33               |
| 11 | -0.33               |
| 12 | -0.32               |

**Table S7.** Parameters for different kinetic models for adsorption studies of MB and Rh-B.

| Model                          | Parameters                                     | MB      | Rh-B   |
|--------------------------------|------------------------------------------------|---------|--------|
| <b>Pseudo first order</b>      | $K_1$ ( $\text{min}^{-1}$ )                    | 0.00016 | 0.0052 |
|                                | $q_e$ (Cal.) (mg/g)                            | 40.43   | 39.64  |
|                                | $q_e$ (Exp.) (mg/g)                            | 49.47   | 53.91  |
|                                | $R^2$                                          | 0.7714  | 0.92   |
| <b>Pseudo second order</b>     | $K_2$ ( $\text{g mg}^{-1} \text{min}^{-1}$ )   | 0.0007  | 0.0007 |
|                                | $q_e$ (Cal.) (mg/g)                            | 50.66   | 47.39  |
|                                | $q_e$ (Exp.) (mg/g)                            | 49.47   | 53.91  |
|                                | $R^2$                                          | 0.99    | 0.99   |
| <b>Intraparticle Diffusion</b> | $K_3$ ( $\text{mg g}^{-1} \text{min}^{-1/2}$ ) | 1.37    | 5.71   |
|                                | C                                              | 27.68   | 6.98   |
|                                | $R^2$                                          | 0.7321  | 0.423  |
